# Supplementary material for: Surface erythemal UV irradiance in the continental United States derived from ground-based and OMI observations: quality assessment, trend analysis and sampling issues
Source: Copernicus journal article supplement (doi:10.5194/acp-19-2165-2019), 2019-02-19
Supplement: Supplementary file [file acp-19-2165-2019-supplement.pdf]

Supplement of Atmos. Chem. Phys., 19, 2165–2181, 2019  
<https://doi.org/10.5194/acp-19-2165-2019-supplement>  
© Author(s) 2019. This work is distributed under  
the Creative Commons Attribution 4.0 License.

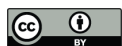

*Supplement of*

## **Surface erythemal UV irradiance in the continental United States derived from ground-based and OMI observations: quality assessment, trend analysis and sampling issues**

**Huanxin Zhang et al.**

*Correspondence to:* Jun Wang ([jun-wang-1@uiowa.edu](mailto:jun-wang-1@uiowa.edu)) and Huanxin Zhang ([huanxin-zhang@uiowa.edu](mailto:huanxin-zhang@uiowa.edu))

The copyright of individual parts of the supplement might differ from the CC BY 4.0 License.

1 **Table S1. The 31 ground observational sites from UVMRP and their geographical information.**

| Station ID | Location              | Latitude (°N) | Longitude (°W) | Elevation (m) |
|------------|-----------------------|---------------|----------------|---------------|
| AZ01       | Flagstaff, AZ         | 36.06         | 112.18         | 2073          |
| CA01       | Davis, CA             | 38.53         | 121.78         | 18            |
| CA21       | Holtville, CA         | 32.81         | 115.45         | -18           |
| CO01       | Nunn, CO              | 40.81         | 104.76         | 1641          |
| CO11       | Steamboat Springs, CO | 40.46         | 106.74         | 3220          |
| CO41       | Lamar, CO             | 38.07         | 102.62         | 1131          |
| FL01       | Homestead, FL         | 25.39         | 80.68          | 0             |
| GA01       | Griffin, GA           | 33.18         | 84.41          | 267           |
| IL01       | Bondville, IL         | 40.05         | 88.37          | 213           |
| IN01       | West Lafayette, IN    | 40.47         | 86.99          | 216           |
| LA01       | Baton Rouge, LA       | 30.36         | 91.17          | 6             |
| MD01       | Queenstown, MD        | 38.92         | 76.15          | 5             |
| MD11       | Beltsville, MD        | 39.01         | 76.95          | 64            |
| ME11       | Presque Isle, ME      | 46.70         | 68.04          | 155           |
| MI01       | Pellston, MI          | 45.56         | 84.68          | 230           |
| MN01       | Grand Rapids, MN      | 47.18         | 93.53          | 424           |
| MT01       | Poplar, MT            | 48.31         | 105.10         | 634           |
| MS01       | Starkville, MS        | 33.47         | 88.78          | 88            |
| NC01       | Raleigh, NC           | 35.73         | 78.68          | 120           |
| ND01       | Fargo, ND             | 46.90         | 96.81          | 275           |
| NE01       | Mead, NE              | 41.15         | 96.49          | 355           |
| NM01       | Las Cruces, NM        | 32.62         | 106.74         | 1317          |
| NY01       | Geneva, NY            | 42.88         | 77.03          | 219           |
| OK01       | Billings, OK          | 36.60         | 97.49          | 317           |
| ON01       | Toronto, ON           | 43.78         | 79.47          | 210           |
| TX21       | Seguin, TX            | 29.57         | 97.98          | 172           |
| TX41       | Houston, TX           | 29.72         | 95.34          | 76            |
| UT01       | Logan, UT             | 41.67         | 111.89         | 1369          |
| VT01       | Burlington, VT        | 44.53         | 72.87          | 390           |
| WA01       | Pullman, WA           | 46.76         | 117.19         | 805           |
| WI01       | Dancy, WI             | 44.71         | 89.77          | 381           |

1 **Table S2. Regression statistics and other validation statistics for evaluating OMI OP\_FS and Noon\_FS EDR with 31 ground**  
2 **observational sites using different spatial collocation distances and temporal averaging windows. Values in the parenthesis are for**  
3 **the Noon\_FS EDR evaluation.**

| statistics <sup>a</sup> | D = 50 <sup>b</sup> |            |            |            | D = 25     | D = 10     |
|-------------------------|---------------------|------------|------------|------------|------------|------------|
|                         | 5 min <sup>c</sup>  | 10 min     | 30 min     | 60 min     | 5 min      | 5 min      |
| N                       | 100836              | 100860     | 100932     | 100978     | 67362      | 17412      |
| R                       | 0.90(0.88)          | 0.90(0.89) | 0.90(0.89) | 0.92(0.91) | 0.90(0.88) | 0.91(0.89) |
| Slope                   | 0.89(0.87)          | 0.90(0.89) | 0.93(0.92) | 0.97(0.96) | 0.9(0.88)  | 0.91(0.89) |
| Intercept               | 20.1(24.8)          | 18.7(22.8) | 15.9(19.7) | 14.0(17.6) | 19.5(24.6) | 18.9(23.7) |
| MB                      | 8.0(8.9)            | 8.0(9.0)   | 8.6(9.8)   | 10.3(12.3) | 8.5(9.2)   | 9.1(9.7)   |
| RMSE                    | 34.9(41.5)          | 33.7(39.9) | 31.6(37.6) | 30.6(36.4) | 35.1(42.5) | 34.8(42.1) |

4 <sup>a</sup>N is the total number of data pairs between OMI and ground observation for 31 sites altogether. R, slope, and intercept are  
5 the values obtained from the linear regression. MB and RMSE represent the mean bias and root-mean-square error as calculated  
6 in Eq. (1) and (3), respectively.

7 <sup>b</sup>D = 50, 25 and 10 are the spatial collocation distances (D = 50 km, 25 km and 10 km) between an OMI ground pixel center  
8 and a ground observational site.

9 <sup>c</sup>5, 10, 30 and 60 are the temporal averaging windows ( $\Delta T = \pm 5, 10, 30$  and 60 minutes) around OMI overpass time or local  
10 solar noon time.

11  
12

1 **Table S3. Ratios of the local solar noon time EDR and overpass time EDR (Noon\_FS/OP\_FS) for both OMI and ground**  
2 **measurements at each site (column 2 and 3), which are shown as mean  $\pm$  standard deviation with the median in the parenthesis. The**  
3 **frequency (%) of the ratio from ground data less than 1 at each site is also included (column 4). Also shown are the median ratios**  
4 **for OMI and ground observational EDR comparison at both overpass and local solar noon time (column 5 and 6) with standard**  
5 **deviation in the parenthesis.**

| Station ID | Ground ratio<br>(Noon_FS/OP_FS) | OMI ratio<br>(Noon_FS/OP_FS) | Frequency<br>(Ground) | OP_FS ratio<br>(OMI/Ground) | Noon_FS ratio<br>(OMI/Ground) |
|------------|---------------------------------|------------------------------|-----------------------|-----------------------------|-------------------------------|
| AZ01       | 1.43 $\pm$ 1.56 (1.17)          | 1.23 $\pm$ 0.22 (1.16)       | 14.6                  | 0.98 (0.48)                 | 0.98 (0.44)                   |
| CA01       | 1.94 $\pm$ 28.8 (1.10)          | 1.18 $\pm$ 0.21 (1.11)       | 12.8                  | 1.04 (0.31)                 | 1.04 (0.35)                   |
| CA21       | 1.18 $\pm$ 0.36 (1.12)          | 1.17 $\pm$ 0.16 (1.12)       | 8.5                   | 1.07 (0.46)                 | 1.09 (0.44)                   |
| CO01       | 1.59 $\pm$ 4.67 (1.11)          | 1.17 $\pm$ 0.22 (1.10)       | 21.8                  | 1.02 (0.52)                 | 1.01 (0.51)                   |
| CO11       | 1.51 $\pm$ 1.51 (1.17)          | 1.21 $\pm$ 0.23 (1.14)       | 20.4                  | 1.23 (0.88)                 | 1.18 (0.82)                   |
| CO41       | 1.19 $\pm$ 0.53 (1.1)           | 1.15 $\pm$ 0.16 (1.10)       | 17.6                  | 1.04 (0.36)                 | 1.04 (0.42)                   |
| FL01       | 1.79 $\pm$ 3.07 (1.24)          | 1.25 $\pm$ 0.20 (1.19)       | 23.1                  | 1.18 (0.61)                 | 1.15 (0.56)                   |
| GA01       | 1.43 $\pm$ 2.28 (1.19)          | 1.22 $\pm$ 0.18 (1.18)       | 20.7                  | 1.07 (0.47)                 | 1.08 (0.47)                   |
| IL01       | 1.42 $\pm$ 4.01 (1.13)          | 1.18 $\pm$ 0.19 (1.12)       | 23.5                  | 1.05 (0.50)                 | 1.04 (0.56)                   |
| IN01       | 1.28 $\pm$ 1.47 (1.10)          | 1.15 $\pm$ 0.16 (1.10)       | 25.8                  | 1.08 (0.47)                 | 1.07 (0.54)                   |
| LA01       | 1.52 $\pm$ 2.12 (1.17)          | 1.22 $\pm$ 0.19 (1.16)       | 21.7                  | 1.08 (0.51)                 | 1.08 (0.52)                   |
| MD01       | 1.30 $\pm$ 2.1 (1.11)           | 1.17 $\pm$ 0.17 (1.11)       | 22.6                  | 1.05 (0.47)                 | 1.06 (0.54)                   |
| MD11       | 1.31 $\pm$ 2.47 (1.12)          | 1.19 $\pm$ 0.21 (1.12)       | 25.5                  | 1.05 (0.41)                 | 1.05 (0.49)                   |
| ME11       | 1.26 $\pm$ 0.72 (1.11)          | 1.18 $\pm$ 0.22 (1.10)       | 26.3                  | 1.02 (0.50)                 | 1.02 (0.57)                   |
| MI01       | 1.25 $\pm$ 1.57 (1.08)          | 1.13 $\pm$ 0.16 (1.08)       | 27.7                  | 1.02 (0.48)                 | 1.01 (0.53)                   |
| MN01       | 1.75 $\pm$ 26.7 (1.10)          | 1.15 $\pm$ 0.20 (1.09)       | 24.7                  | 1.07 (0.44)                 | 1.06 (0.50)                   |
| MT01       | 1.18 $\pm$ 1.08 (1.06)          | 1.11 $\pm$ 0.16 (1.05)       | 25.9                  | 1.03 (0.50)                 | 1.03 (0.52)                   |
| MS01       | 1.38 $\pm$ 1.56 (1.16)          | 1.22 $\pm$ 0.20 (1.16)       | 22.6                  | 1.08 (0.44)                 | 1.08 (0.52)                   |
| NC01       | 1.36 $\pm$ 2.37 (1.13)          | 1.19 $\pm$ 0.19 (1.13)       | 22.9                  | 1.04 (0.50)                 | 1.03 (0.51)                   |
| ND01       | 1.34 $\pm$ 7.94 (1.08)          | 1.14 $\pm$ 0.17 (1.08)       | 25.2                  | 1.01 (0.52)                 | 1.01 (0.57)                   |
| NE01       | 1.23 $\pm$ 0.73 (1.11)          | 1.16 $\pm$ 0.17 (1.11)       | 21.9                  | 1.06 (0.43)                 | 1.06 (0.48)                   |
| NM01       | 1.35 $\pm$ 1.39 (1.17)          | 1.22 $\pm$ 0.20 (1.16)       | 11.6                  | 0.98 (0.36)                 | 0.98 (0.30)                   |
| NY01       | 1.33 $\pm$ 0.93 (1.14)          | 1.20 $\pm$ 0.22 (1.13)       | 27.7                  | 1.02 (0.53)                 | 1.01 (0.61)                   |
| OK01       | 1.22 $\pm$ 0.89 (1.09)          | 1.14 $\pm$ 0.14 (1.10)       | 22.4                  | 1.03 (0.39)                 | 1.03 (0.44)                   |
| ON01       | 1.34 $\pm$ 1.37 (1.12)          | 1.17 $\pm$ 0.20 (1.11)       | 27.0                  | 1.06 (0.48)                 | 1.05 (0.55)                   |
| TX21       | 1.37 $\pm$ 2.58 (1.14)          | 1.22 $\pm$ 0.18 (1.16)       | 22.3                  | 1.03 (0.41)                 | 1.05 (0.49)                   |

|      |                        |                        |      |             |             |
|------|------------------------|------------------------|------|-------------|-------------|
| TX41 | $1.55 \pm 6.24$ (1.18) | $1.24 \pm 0.19$ (1.18) | 24.6 | 1.09 (0.56) | 1.09 (0.57) |
| UT01 | $1.26 \pm 0.91$ (1.11) | $1.17 \pm 0.18$ (1.12) | 18.9 | 1.05 (0.49) | 1.05 (0.55) |
| VT01 | $1.25 \pm 0.88$ (1.07) | $1.13 \pm 0.19$ (1.07) | 32.2 | 1.16 (0.65) | 1.17 (0.68) |
| WA01 | $1.19 \pm 0.62$ (1.08) | $1.14 \pm 0.17$ (1.08) | 25.9 | 1.01 (0.42) | 1.01 (0.47) |
| WI01 | $1.30 \pm 1.48$ (1.10) | $1.18 \pm 0.25$ (1.09) | 27.2 | 1.03 (0.48) | 1.03 (0.51) |

---

1  
2

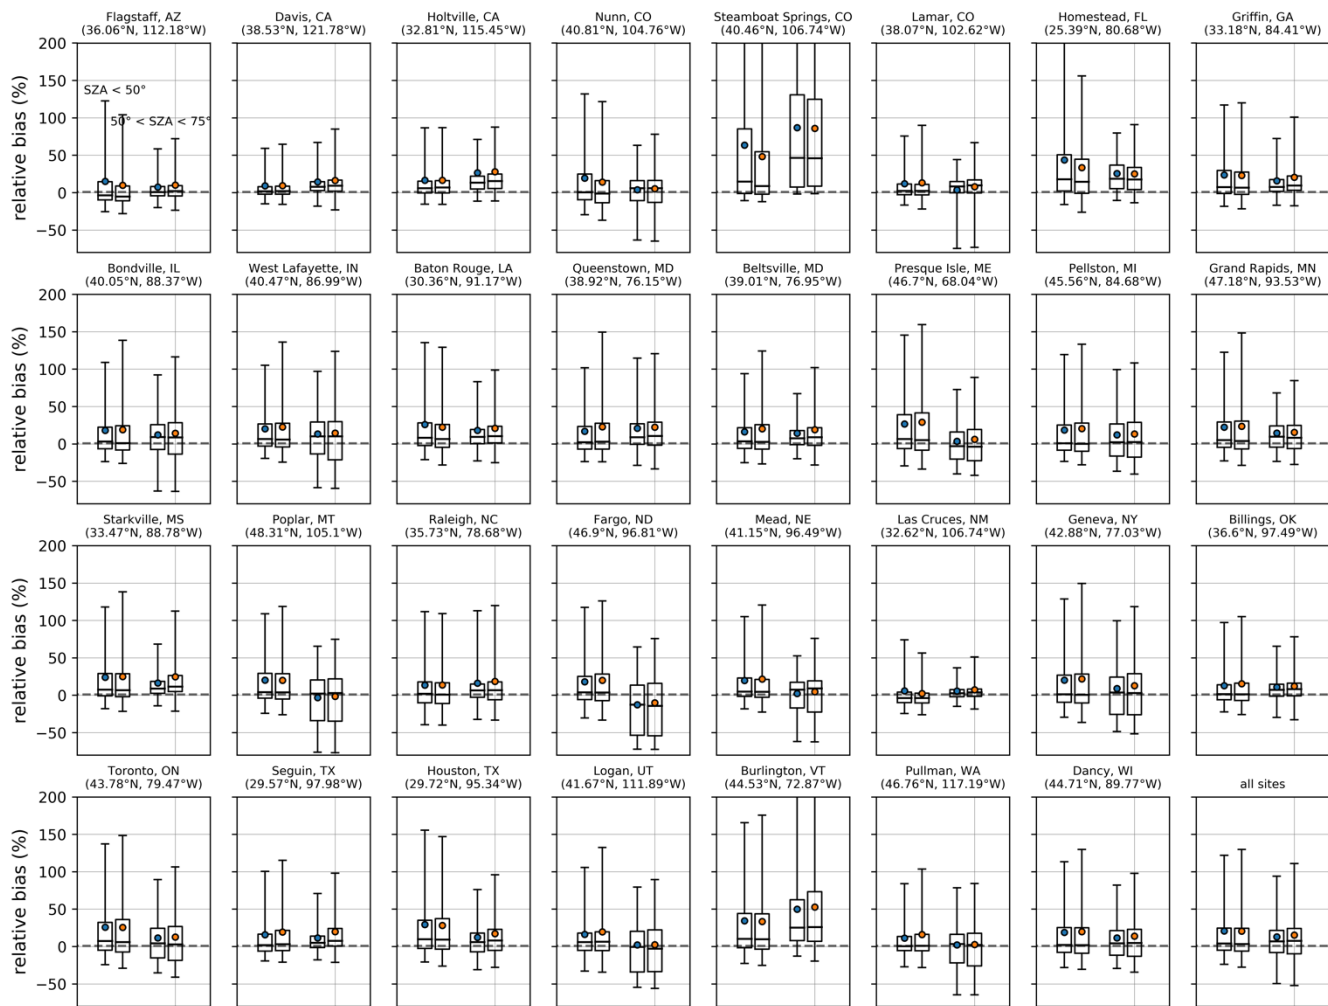

1  
 2 **Figure S1: Box-whisker plots of the relative bias (%) between OMI and ground measured EDR for each site grouped by different**  
 3 **SZAs. Blue dots represent the relative bias for OMI overpass time EDR comparison while orange dots represent the local solar noon**  
 4 **time comparison. On each box-whisker plot, the left pair shows the data grouped with SZA less than  $50^\circ$  while the right pair is for**  
 5 **data grouped with SZA between  $50^\circ$  and  $75^\circ$ . Also shown on each box-whisker plot is the 5th and 95th percentiles (whisker), the**  
 6 **interquartile range (box), the median (black line) and the mean (the dot).**

7  
8

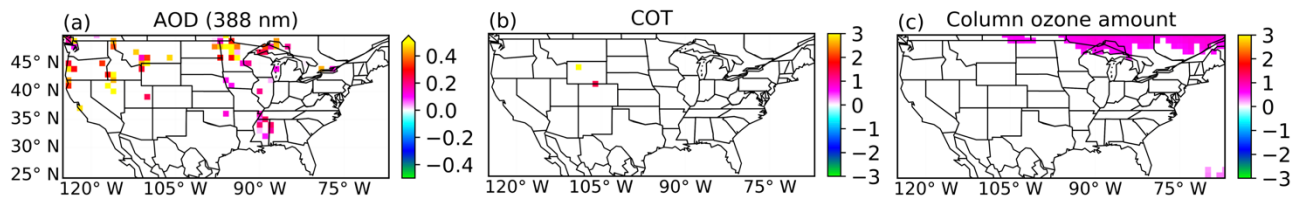

1  
 2 **Figure S2: (a), (b) and (c) shows the areas with significant trends (95% confidence level) of OMI level 3 AOD at 388 nm, COT and**  
 3 **column ozone amount, respectively. The trends in (a), (b) and (c) are calculated as 100 x AOD/year, 100 x COT/year and column**  
 4 **DU/yr, respectively.**

5  
 6  
 7

IL01 (Bondville, IL)

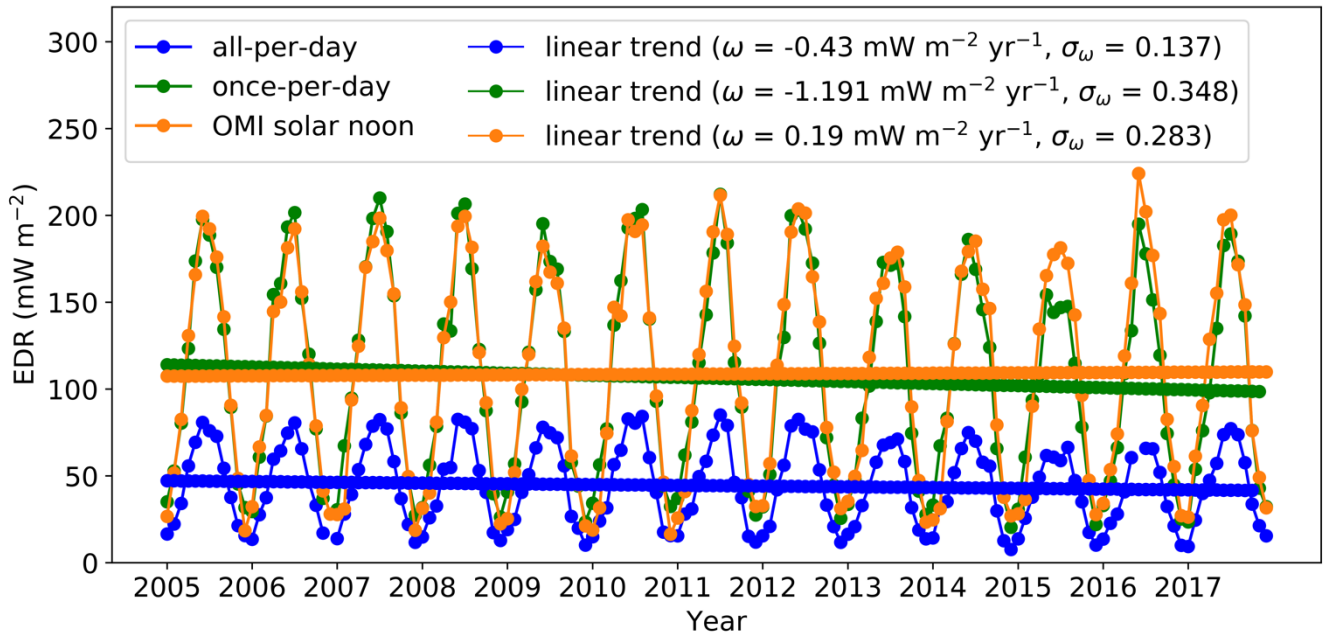

1

2 **Figure S3: Time series (dotted lines) of monthly OMI level 3 solar noon time full-sky EDR (orange) and ground observational EDR**  
 3 **from 2005–2017 using once-per-day (green) and all-per-day (blue) sampling method for site IL01. The once-per-day sampling**  
 4 **collects EDR data around local solar noon time while the all-per-day averages all the EDR data in a day. The straight lines are the**  
 5 **linear trends derived from Eq. (6).**

6

7
